# Supplementary material for: Effects of pulsing of light on the dentinogenesis of dental pulp stem cells in vitro
Source: PubMed Central journal article supplement (PMC5795010; doi:10.1038/s41598-018-19395-x), 2018-02-01
Supplement: 41598_2018_19395_MOESM1_ESM.pdf [file 41598_2018_19395_MOESM1_ESM.pdf]

## Supporting informations

### Effects of pulsing of light on the dentinogenesis of dental pulp stem cells *in vitro*

Hong Bae Kim<sup>1†</sup>, Ku Youn Baik<sup>2†</sup>, Hoon Seonwoo<sup>3</sup>, Kyoung-Je Jang<sup>1</sup>, Myung Chul Lee<sup>1</sup>,  
Pill-Hoon Choung<sup>4</sup>, Jong Hoon Chung<sup>1\*</sup>

<sup>1</sup>Department of Biosystems & Biomaterials Science and Engineering, Seoul National University, Seoul, 08826, Republic of Korea

<sup>2</sup>Electrical and Biological Physics, Kwangwoon University, Seoul, 01897, Republic of Korea

<sup>3</sup>Department of Industrial Machinery Engineering, Sunchon National University, Jeollanam-do, 57922, Republic of Korea

<sup>4</sup>Department of Oral and Maxillofacial Surgery and Dental Research Institute, School of Dentistry, Seoul National University, Seoul, 03080, Republic of Korea

\*Corresponding author e-mail: [jchung@snu.ac.kr](mailto:jchung@snu.ac.kr)

†Both authors contribute equally to this work

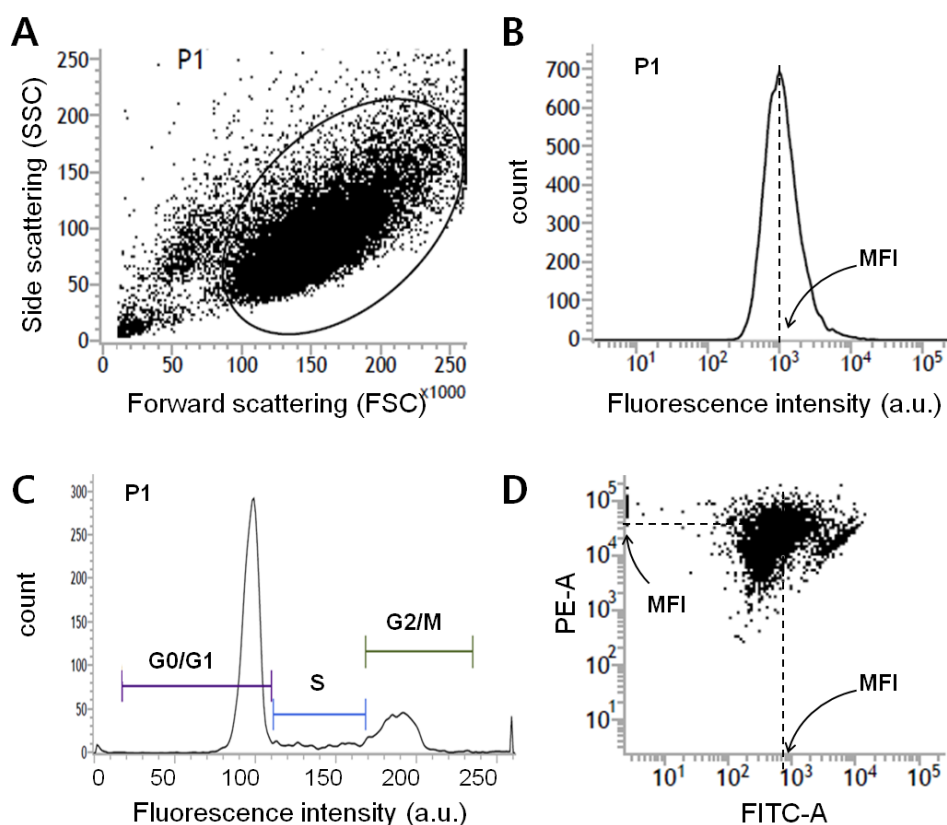

Figure S1. Typical graphs used to analyze the flow cytometry data. **A.** A typical 2D plot of forward (FSC) and side (SSC) scattering. Cells in certain ranges of FSC and SSC values were gated for further analysis. **B.** A typical graph of cell number distribution for one fluorescence measurement. The area integral of fluorescence intensity was used for measurement of the value per a cell. Mean fluorescence intensity (MFI) of each group was used for statistical analysis. **C.** A typical cell cycle graph, whose x-axis is the intensity of propidium iodide which is linearly increasing with DNA contents of a cell. It is divided to three parts as G0/G1, S, and G2/M states, and the population belong to each part is analyzed. **D.** A typical 2D graph of JC1 stained cells. The MFIs of FITC and PE were measured separately and the ratio of PE/FITC was used as a mitochondrial membrane potential.

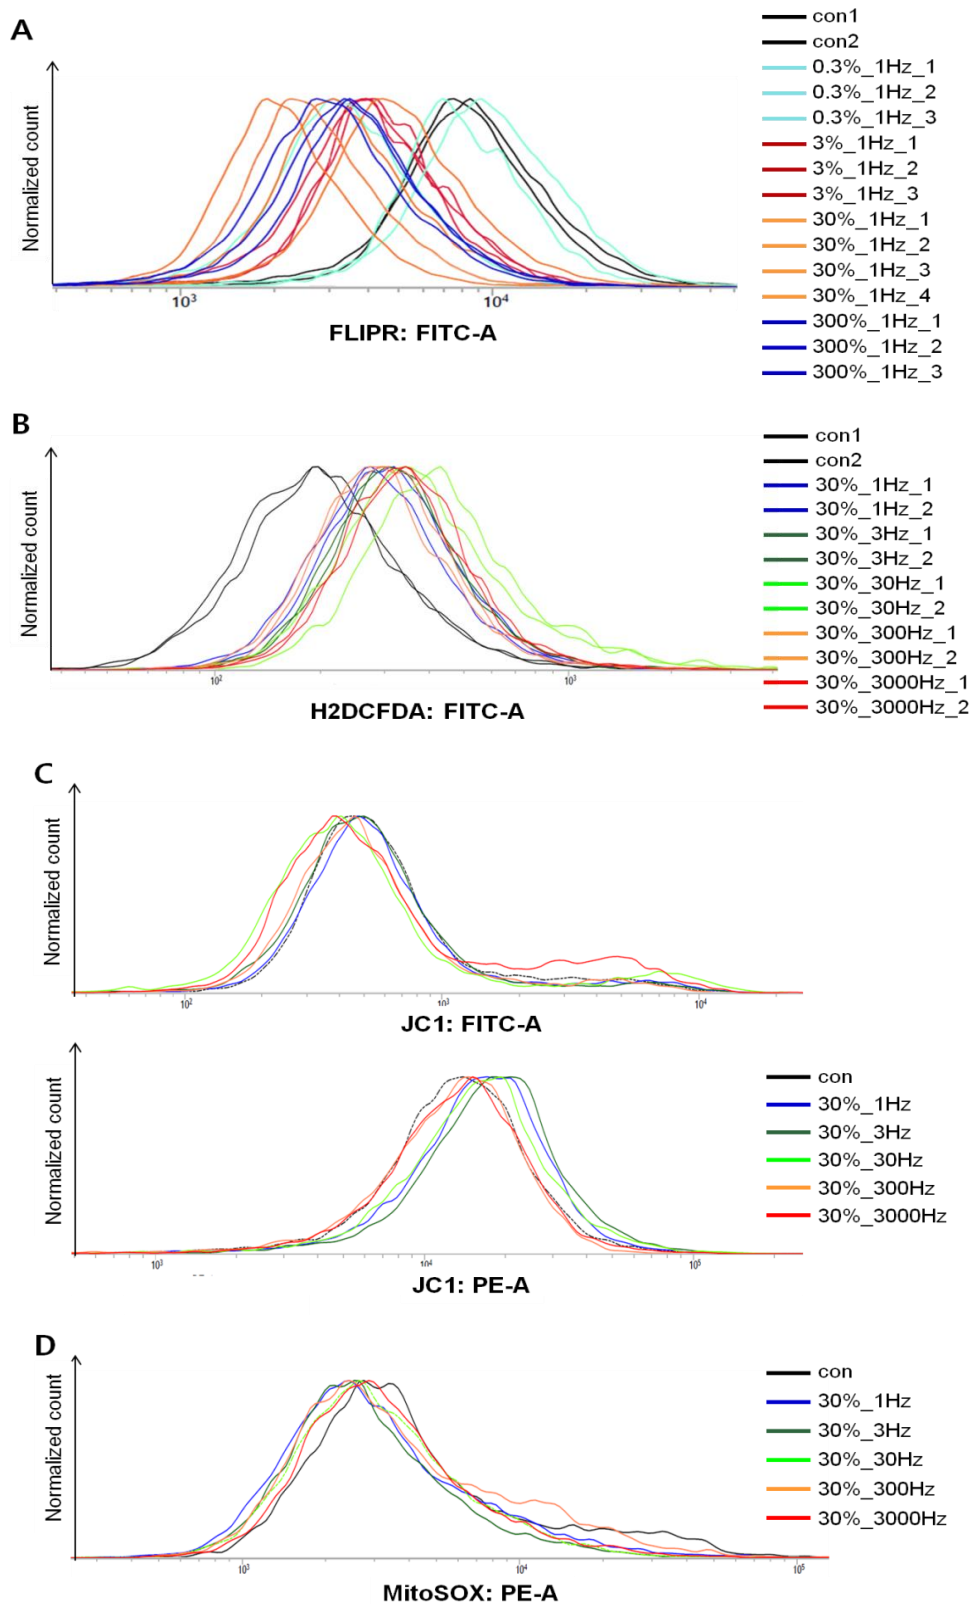

Figure S2. Typical data for measurement of cellular immediate responses to PW-LPL. Cells were stained with **A.** FLIPR, **B.** H2DCFDA, **C.** JC1, or **D.** MitoSOX.

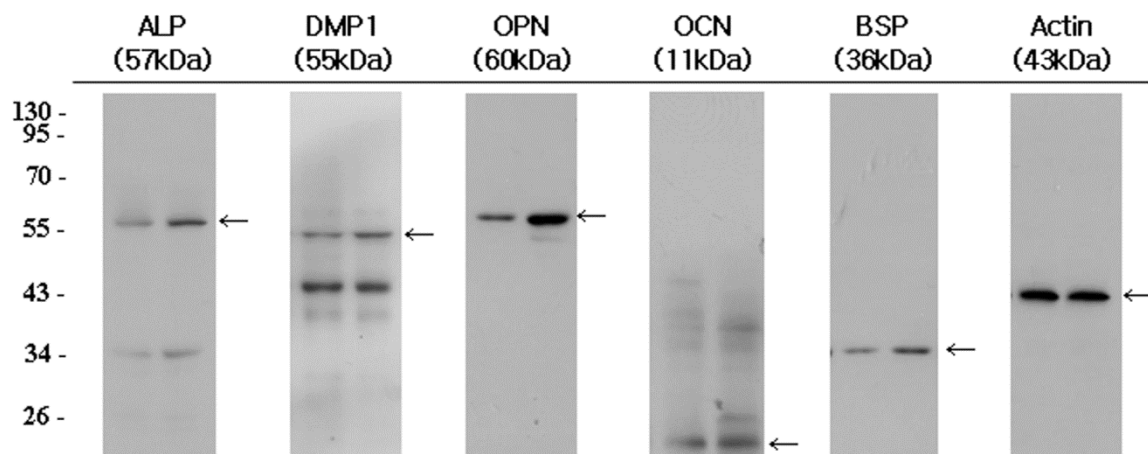

Figure S3. The original gel images for the protein expression of ALP, DMP1, OPN, OCN, BSP, Actin.
